# Supplementary material for: The humoral pattern recognition receptor PTX3 is stored in neutrophil granules and localizes in extracellular traps
Source: PubMed Central journal article supplement — J Exp Med. 2007 Apr 16;204(4):793–804. doi: 10.1084/jem.20061301 (PMC2118544; doi:10.1084/jem.20061301), 2007-04-16
Supplement: jexpmed_jem.20061301_5.pdf [file jexpmed_jem.20061301_5.pdf]

**Jaillon et al., <http://www.jem.org/cgi/content/full/jem.20061301/DC1>****SUPPLEMENTAL MATERIALS AND METHODS**

**Binding assay.** Neutrophil-derived PTX3 (PMN-PTX3) was purified by immunochromatography from a PMN lysate (sepharose–protein G cross-linked with an anti-PTX3 mAb) as previously described (44); the purity of this preparation was ~90%. Binding of PTX3 to OmpA and C1q was performed essentially as previously described (18). In brief, 96-well plates (Nunc) were coated overnight at 4°C with 5 µg/ml KpOmpA or with 10 µg/ml C1q and blocked with 5% dry milk in washing buffer (PBS containing 0.05% Tween 20) for 2 h at room temperature before incubation for 30 min at 37°C with PMN-PTX3, PMN lysate, or recombinant PTX3 in washing buffer. After washing, plates were incubated with 1 µg/ml of a biotin-conjugated PTX3 affinity-purified rabbit IgG, followed by horseradish peroxidase-labeled streptavidin (Bio-Spa). Absorbance values were read at 450 nm after the addition of the chromogen substrate TMB and stop solution.

Binding of PMN-PTX3, obtained from a concentrated supernatant of PMN stimulated with *E. coli* LPS (200 ng/ml) and GM-CSF (50 ng/ml) for 16 h, to *A. fumigatus* conidia was performed as previously described (15) and analyzed by a flow cytometer (FACSCanto; BD Biosciences).

**Analysis of PTX3, MPO, lactoferrin, and MMP-9 mRNA expression in HL60 cells and human bone marrow.**

For HL60 cells, total RNA isolation and cDNA synthesis were performed as described in Materials and methods. Bone marrow cDNA was obtained from CLONTECH Laboratories, Inc. Sequences of PTX3- and MPO-specific primers are described in Materials and methods. Lactoferrin and MMP-9 mRNA expression were evaluated using specific oligonucleotides (lactoferrin: 5'-ATCCCAACAAAGCAGTGACC-3' and 5'-CAACGTCTCCAGCATTCTCA-3'; MMP-9: 5'-CATCGTCATCCAGTTTGGTG-3' and 5'-GCCTTGGAAGATGAATGGAA-3').
